# Supplementary material for: Relationship of Mammographic Density and Gene Expression: Analysis of Normal Breast Tissue Surrounding Breast Cancer
Source: Oxford University Press journal article supplement (doi:10.1158/1078-0432.ccr-13-0029), 2013-08-06
Supplement: 10780432ccr130029-sup-table_s4.xlsx [file 10780432ccr130029-sup-table_s4.xlsx]

## Sheet: Age sig
Age signature
ENTREZ	Standard vector
19	-1
38	-1
38	-1
95	1
191	1
216	-1
284	-1
284	-1
327	1
331	-1
354	1
443	-1
444	-1
514	-1
551	1
586	-1
605	1
635	-1
644	-1
645	-1
664	-1
683	-1
730	-1
738	1
767	1
780	1
780	1
790	1
799	-1
801	-1
808	-1
824	-1
830	-1
843	-1
843	-1
902	-1
940	-1
965	-1
969	-1
1029	-1
1036	-1
1119	1
1131	1
1131	1
1153	1
1154	1
1154	1
1181	1
1182	-1
1193	-1
1213	-1
1240	-1
1375	1
1454	1
1499	1
1511	-1
1577	-1
1580	-1
1663	1
1666	-1
1666	-1
1718	1
1730	-1
1730	-1
1735	-1
1738	-1
1787	-1
1829	1
1838	1
1852	1
1856	1
1879	-1
1911	1
1937	1
1938	1
1942	1
1969	1
1984	1
1984	1
2002	1
2009	-1
2011	1
2050	1
2054	-1
2060	-1
2078	-1
2108	-1
2122	-1
2196	1
2213	-1
2288	1
2444	-1
2542	1
2581	-1
2593	1
2627	-1
2662	-1
2662	-1
2686	1
2690	-1
2788	1
2790	-1
2819	-1
2837	1
2905	-1
3005	1
3012	1
3054	1
3067	-1
3075	-1
3075	-1
3075	-1
3269	-1
3276	1
3344	-1
3570	-1
3603	-1
3609	1
3675	1
3714	1
3717	-1
3728	1
3835	1
3841	-1
3908	-1
3985	1
3985	1
4004	-1
4060	-1
4094	-1
4094	-1
4094	-1
4150	1
4154	-1
4194	-1
4208	-1
4239	-1
4240	1
4254	-1
4257	-1
4286	-1
4287	-1
4287	-1
4326	1
4482	-1
4627	1
4644	-1
4644	-1
4651	1
4651	1
4708	-1
4744	1
4762	1
4801	-1
4841	1
4849	1
4857	-1
4883	-1
4886	-1
4889	-1
4907	-1
4926	1
5050	1
5066	-1
5101	-1
5105	-1
5130	-1
5130	-1
5136	-1
5136	-1
5136	-1
5136	-1
5140	-1
5141	-1
5144	-1
5166	-1
5167	-1
5195	-1
5239	-1
5239	-1
5279	-1
5337	-1
5338	1
5352	-1
5364	1
5412	-1
5424	1
5424	1
5442	1
5531	1
5552	-1
5567	-1
5627	-1
5627	-1
5627	-1
5634	1
5689	-1
5689	-1
5701	-1
5734	-1
5739	-1
5818	1
5834	1
5859	1
5883	1
5898	-1
5908	-1
5908	-1
5950	-1
5980	-1
6134	1
6139	1
6159	1
6159	1
6159	1
6159	1
6189	1
6189	1
6198	-1
6198	-1
6223	1
6275	-1
6305	1
6335	-1
6335	-1
6386	-1
6400	-1
6414	-1
6445	-1
6464	1
6468	1
6472	1
6474	-1
6474	-1
6495	-1
6508	1
6520	1
6526	-1
6597	1
6598	1
6601	1
6621	1
6624	1
6647	-1
6659	1
6660	-1
6660	-1
6666	1
6721	1
6741	-1
6764	1
6776	1
6867	-1
6909	-1
6941	1
6990	-1
6990	-1
7010	-1
7026	-1
7035	-1
7037	-1
7050	1
7082	-1
7099	-1
7111	-1
7117	-1
7125	-1
7157	1
7186	1
7205	1
7249	1
7292	-1
7297	1
7534	-1
7593	1
7625	1
7629	1
7755	1
7919	1
7919	1
8073	-1
8082	-1
8228	-1
8289	1
8322	-1
8325	1
8349	1
8394	1
8484	1
8525	1
8526	-1
8541	1
8663	1
8705	-1
8720	1
8772	1
8774	-1
8817	-1
8825	-1
8835	-1
8837	-1
8839	-1
8840	-1
8853	-1
8869	-1
8869	-1
8876	-1
8876	-1
8884	1
8884	1
8905	-1
8905	-1
8906	1
8943	1
8971	1
8992	-1
9043	-1
9050	1
9098	-1
9136	1
9194	-1
9240	-1
9315	1
9353	-1
9353	-1
9368	1
9444	-1
9444	-1
9473	-1
9475	-1
9508	-1
9532	-1
9547	-1
9569	1
9590	-1
9590	-1
9618	1
9632	1
9641	1
9654	1
9659	-1
9686	1
9736	-1
9742	1
9743	1
9757	1
9770	-1
9820	1
9839	-1
9839	-1
9869	1
9910	-1
9918	1
9936	-1
9945	-1
9968	1
9976	-1
9976	-1
10025	1
10061	1
10097	-1
10097	-1
10157	-1
10160	1
10216	-1
10226	1
10251	-1
10291	1
10371	-1
10371	-1
10395	-1
10399	1
10439	-1
10457	-1
10476	-1
10479	-1
10489	1
10490	-1
10490	-1
10491	-1
10513	-1
10522	1
10523	1
10558	-1
10607	1
10673	-1
10742	-1
10743	1
10800	-1
10878	-1
10905	-1
10919	1
10919	1
11031	-1
11079	1
11107	-1
11154	-1
11213	-1
11252	1
11252	1
22797	-1
22822	1
22822	1
22833	-1
22871	-1
22875	-1
22902	-1
22919	-1
22921	-1
22930	-1
22998	-1
23002	-1
23002	-1
23005	1
23028	1
23034	-1
23077	-1
23085	-1
23136	-1
23179	-1
23200	-1
23208	-1
23208	-1
23276	1
23301	-1
23326	1
23327	1
23327	1
23345	-1
23363	1
23403	1
23433	-1
23492	1
23580	1
23593	-1
23598	1
23598	1
23643	-1
23644	1
23647	1
23654	1
23654	1
25849	-1
25939	-1
25959	-1
26099	-1
26272	-1
26578	-1
26823	1
27005	1
27023	1
27097	-1
27145	-1
27235	-1
27237	1
27250	1
27250	1
27316	1
27316	1
27319	-1
27344	1
27346	1
27352	1
28962	-1
28966	-1
28987	1
28987	1
29081	-1
29882	1
29887	-1
29887	-1
29894	1
29915	-1
30812	1
30827	1
50507	-1
50507	-1
50512	1
50628	1
50940	-1
51024	-1
51082	1
51084	-1
51108	1
51115	-1
51115	-1
51119	-1
51136	-1
51170	-1
51185	-1
51209	-1
51277	-1
51278	1
51338	-1
51365	-1
51477	1
51490	1
51527	-1
51547	1
51614	1
51660	-1
51750	1
53342	-1
53373	1
54221	-1
54469	-1
54518	-1
54553	1
54751	1
54796	-1
54796	-1
54873	-1
54928	-1
54968	-1
54972	1
54973	1
55005	-1
55012	-1
55139	1
55147	1
55147	1
55179	-1
55333	-1
55352	-1
55366	1
55374	1
55389	-1
55506	1
55529	-1
55573	-1
55704	-1
55704	-1
55714	-1
55722	1
55727	-1
55752	-1
55757	-1
55796	-1
55799	-1
55799	-1
55819	-1
55831	-1
55843	-1
55885	-1
56652	1
57097	-1
57118	-1
57130	1
57134	-1
57186	-1
57188	-1
57332	1
57404	-1
57404	-1
57419	-1
57473	1
57559	-1
57666	1
57708	-1
57826	-1
58533	-1
63922	1
63976	-1
64081	-1
64097	-1
64321	1
64359	1
64400	-1
64400	-1
64420	-1
64794	1
64943	1
65108	1
65124	1
79137	1
79175	-1
79191	1
79611	-1
79625	-1
79649	-1
79664	-1
79711	1
79739	-1
79760	1
79776	-1
79797	1
79839	-1
79843	-1
79869	1
79883	1
79974	-1
79987	-1
79987	-1
80143	-1
80154	1
80233	1
80267	-1
80723	-1
80723	-1
80790	1
80856	-1
81029	1
81493	-1
81571	1
81628	1
81706	1
81932	1
83541	1
83544	-1
83641	-1
83857	-1
83879	1
84056	-1
84105	-1
84219	1
84231	1
84261	1
84265	-1
84271	1
84288	1
84293	-1
84448	-1
84461	1
84498	1
84552	1
84719	-1
84747	1
84888	-1
84891	1
85377	1
85477	-1
89797	-1
90411	-1
91526	-1
91543	-1
91584	-1
91612	-1
91937	-1
92126	-1
92521	-1
92521	-1
92906	-1
93589	-1
94240	-1
114991	1
115265	-1
115294	-1
115361	-1
116039	-1
116138	1
116255	-1
116447	1
116988	1
118432	1
121512	-1
122553	-1
122616	1
122616	1
122616	1
122786	1
123803	-1
124583	1
125113	-1
127943	1
129685	-1
130026	-1
130026	-1
130399	-1
130814	-1
131870	-1
134957	-1
136319	-1
137964	1
139065	-1
139818	-1
140462	-1
140688	1
142678	1
143187	-1
144363	-1
146057	-1
147015	1
147808	1
149351	-1
151254	-1
151258	-1
151556	-1
151556	-1
151827	-1
152485	1
155435	-1
157773	-1
158056	1
158295	-1
159013	-1
160428	-1
160897	-1
161725	1
162394	-1
163732	1
169792	-1
170680	1
197258	1
197335	1
201134	-1
201895	-1
205327	-1
205327	-1
206338	-1
219749	-1
221662	-1
221806	1
221895	-1
256355	1
256355	1
259230	-1
283078	-1
283464	-1
284114	1
284185	-1
284217	1
284232	-1
284441	-1
285148	-1
285753	-1
285966	1
286144	-1
286467	1
317762	1
317772	1
339344	1
339352	1
339390	-1
340947	1
342035	-1
347735	1
353134	1
353141	1
375010	-1
375061	-1
375790	1
387758	-1
388152	1
388341	-1
388403	-1
388815	-1
388815	-1
388886	1
389058	1
390705	1
404201	-1
414328	-1
439951	1
440712	-1
441094	-1
441430	-1
493869	-1
493869	-1
552889	1
554203	-1
619426	-1
644189	-1
644192	-1
644538	-1
645513	-1
646890	-1
647121	-1
647121	-1
723790	1
727910	-1
728131	1
728142	-1
729046	1
100127980	1
100129397	-1
100129406	-1
100131582	1
100131646	-1
100287512	1

## Sheet: DTF_sig
DTF signature
ENTREZ	Standard vector
165	1
187	1
196	1
205	-1
216	-1
248	-1
273	1
273	1
288	-1
347	-1
358	1
440	-1
445	-1
445	-1
583	-1
590	-1
596	-1
596	-1
624	1
633	1
634	-1
645	1
687	-1
780	-1
780	-1
800	1
800	1
860	1
871	1
928	1
948	-1
1009	1
1009	1
1009	1
1028	1
1040	-1
1075	1
1264	1
1272	1
1277	1
1278	1
1278	1
1281	1
1281	1
1281	1
1281	1
1287	-1
1287	-1
1289	1
1290	1
1290	1
1291	1
1291	1
1291	1
1291	1
1292	1
1292	1
1292	1
1295	1
1295	1
1299	-1
1301	1
1301	1
1303	1
1307	1
1308	-1
1316	1
1382	1
1397	1
1462	1
1462	1
1462	1
1462	1
1466	1
1490	1
1490	1
1513	1
1577	-1
1604	1
1604	1
1645	-1
1803	1
1805	1
1805	1
1806	-1
1809	1
1829	1
1831	-1
1832	1
1842	1
1893	1
1902	1
1909	1
1947	-1
1953	1
1958	1
1999	-1
2006	1
2059	-1
2064	-1
2149	1
2152	-1
2199	1
2200	1
2200	1
2202	-1
2252	-1
2257	1
2274	1
2289	-1
2294	-1
2297	-1
2331	1
2335	1
2335	1
2335	1
2335	1
2339	-1
2355	1
2355	1
2355	1
2535	1
2542	-1
2615	1
2669	1
2697	1
2736	-1
2736	-1
2824	-1
2824	-1
2824	-1
2908	-1
2934	-1
2982	1
2982	1
2982	1
2982	1
3017	-1
3017	-1
3084	1
3084	1
3131	1
3164	1
3216	-1
3257	-1
3290	-1
3371	1
3371	1
3399	1
3400	1
3479	-1
3479	-1
3491	1
3491	1
3554	1
3554	1
3554	1
3624	1
3624	1
3676	-1
3676	-1
3693	1
3709	-1
3709	-1
3730	1
3815	1
3852	1
3856	-1
3959	-1
3977	-1
3977	-1
3977	-1
4008	-1
4015	1
4015	1
4015	1
4015	1
4016	1
4046	-1
4060	1
4060	1
4082	1
4082	1
4162	1
4192	1
4223	1
4237	1
4257	-1
4320	1
4320	1
4330	1
4548	1
4603	-1
4627	1
4650	-1
4651	1
4651	1
4664	-1
4664	-1
4681	1
4781	-1
4781	-1
4781	-1
4784	-1
4854	1
4856	1
4900	-1
4920	1
4969	1
4969	1
5122	-1
5125	1
5157	1
5157	1
5308	1
5328	1
5358	1
5362	1
5376	1
5376	1
5396	1
5549	1
5567	-1
5567	-1
5580	-1
5580	-1
5580	-1
5602	-1
5616	-1
5624	-1
5634	-1
5733	1
5733	1
5744	1
5764	1
5915	1
5919	1
5997	-1
6281	1
6281	1
6288	-1
6337	-1
6347	-1
6382	1
6382	1
6383	1
6424	1
6440	-1
6461	1
6472	-1
6581	-1
6662	-1
6678	1
6678	1
6678	1
6695	-1
6778	-1
6913	1
6924	1
7042	1
7042	1
7043	1
7052	-1
7057	1
7057	1
7058	1
7070	1
7070	1
7070	1
7090	-1
7090	-1
7102	-1
7140	-1
7175	-1
7205	-1
7275	1
7291	1
7412	-1
7515	1
7832	-1
7837	1
8038	1
8038	1
8038	1
8038	1
8038	1
8038	1
8313	1
8313	1
8321	1
8321	1
8324	-1
8334	-1
8339	-1
8349	-1
8407	1
8507	-1
8507	-1
8510	1
8510	1
8510	1
8536	-1
8577	1
8609	1
8613	-1
8828	1
8840	1
8840	1
8848	-1
8848	-1
8891	1
8910	1
8970	-1
8974	1
9021	1
9023	1
9055	1
9077	-1
9098	-1
9125	-1
9255	1
9315	1
9315	1
9315	1
9315	1
9315	1
9452	-1
9452	-1
9509	1
9510	1
9510	1
9542	-1
9547	1
9577	1
9590	1
9654	1
9659	1
9719	-1
9737	-1
9781	1
9796	-1
9886	1
9891	1
9891	1
9891	1
9920	1
9935	1
9935	1
9938	-1
9976	1
9976	1
10123	1
10123	1
10144	-1
10154	1
10160	1
10160	1
10186	1
10194	1
10231	1
10234	1
10234	1
10272	1
10280	1
10398	1
10409	1
10418	1
10418	1
10457	1
10457	1
10461	-1
10499	-1
10549	1
10580	-1
10602	1
10602	1
10615	-1
10628	-1
10628	-1
10628	-1
10631	1
10631	1
10791	-1
10924	1
10954	1
11015	1
11031	1
11031	1
11031	1
11057	-1
11060	1
11064	-1
11223	-1
11227	1
11259	1
11346	-1
22809	-1
22837	1
22925	1
22936	1
22982	1
23022	1
23038	1
23171	-1
23199	-1
23199	-1
23213	1
23231	-1
23255	1
23266	1
23312	-1
23362	-1
23413	1
23452	1
23493	1
23580	-1
23580	-1
25797	1
25840	-1
25840	-1
25840	-1
25840	-1
25849	-1
25903	1
25925	1
25948	-1
25987	1
26011	-1
26018	1
26031	1
27075	1
27122	1
27286	1
27295	1
29896	-1
30061	-1
30061	-1
51280	1
51313	1
51330	1
51449	1
51637	1
51703	-1
51704	1
54102	-1
54477	-1
54532	-1
54749	1
54843	1
54843	1
54878	-1
55203	1
55283	-1
55366	1
55504	1
55512	-1
55630	1
55752	1
55757	-1
55799	1
55809	-1
55830	1
56776	-1
56937	1
56937	1
56937	1
56940	-1
56940	-1
56999	1
57125	1
57572	1
57664	-1
57722	1
57758	1
58189	1
60468	1
63895	1
64065	1
64094	1
64167	-1
64175	1
64388	1
64403	-1
64403	-1
64855	1
64943	1
79365	-1
79674	-1
79745	-1
79783	1
79805	1
79805	1
79805	1
79822	1
79827	1
79827	1
80206	1
80381	1
81563	-1
81578	-1
81671	1
83468	1
83716	1
83853	-1
83999	1
83999	1
84168	1
84168	1
84221	1
84342	1
84669	-1
84848	1
84848	1
84848	1
84875	1
84886	1
84886	1
84898	1
85236	-1
85409	1
89796	1
89796	1
89796	1
90102	1
90355	-1
90362	1
90634	-1
90853	1
90993	1
91050	1
91851	-1
94015	-1
112476	-1
114757	-1
114904	1
114904	1
115701	1
115701	1
115908	1
117178	-1
117178	-1
117178	-1
117178	-1
117178	-1
117248	1
121601	1
122953	1
124540	-1
124540	-1
129080	1
130271	1
131578	1
133418	-1
133584	-1
133584	-1
140766	1
143686	-1
147495	1
147906	1
147947	-1
147947	-1
151126	-1
151887	1
151887	1
151887	1
152007	1
160428	1
161291	-1
165215	-1
169792	1
219972	-1
222865	1
223117	1
253827	1
253827	1
255919	1
344558	1
374946	1
376940	-1
389136	1
401237	1

## Sheet: E2_sig
E2 signature
ENTREZ	Standard vector
12	1
16	-1
18	1
47	-1
51	-1
60	-1
100	1
150	1
152	-1
190	1
224	1
286	-1
332	-1
348	-1
353	1
367	-1
375	-1
390	1
403	1
463	-1
481	1
509	-1
549	1
563	1
567	-1
594	1
597	-1
641	-1
662	-1
665	1
675	-1
677	1
678	1
699	-1
705	-1
767	1
833	-1
864	-1
890	-1
898	-1
914	-1
915	1
917	-1
919	-1
942	-1
960	1
983	-1
995	-1
1024	-1
1058	-1
1062	-1
1075	-1
1111	1
1123	-1
1141	1
1198	-1
1244	1
1327	-1
1374	-1
1429	1
1503	1
1511	1
1514	-1
1515	1
1580	1
1612	-1
1723	-1
1728	-1
1783	-1
1788	-1
1793	1
1820	1
1826	1
1844	-1
1861	-1
1869	-1
1874	-1
1880	-1
1960	1
1978	1
2015	-1
2017	-1
2071	-1
2130	1
2175	-1
2192	1
2274	1
2317	1
2331	-1
2353	1
2530	1
2553	-1
2581	1
2584	-1
2617	-1
2624	-1
2633	-1
2672	-1
2743	1
2944	1
2947	1
2987	-1
3005	1
3008	-1
3009	-1
3021	-1
3035	-1
3106	-1
3134	-1
3157	-1
3161	-1
3169	-1
3242	-1
3249	1
3326	-1
3329	-1
3422	-1
3476	1
3479	1
3481	1
3485	1
3487	1
3493	1
3514	1
3572	1
3620	-1
3638	1
3662	-1
3667	1
3669	-1
3692	-1
3735	-1
3790	1
3795	-1
3832	-1
3838	-1
3860	1
3866	1
3902	-1
3909	1
3932	-1
3936	-1
3945	1
3983	1
3992	1
4043	-1
4057	1
4085	1
4105	-1
4111	1
4129	1
4141	-1
4145	1
4175	-1
4199	1
4239	1
4312	1
4435	1
4521	-1
4600	-1
4601	1
4602	1
4605	-1
4644	1
4646	1
4751	-1
4774	1
4794	-1
4796	-1
4830	-1
4832	1
4839	-1
4860	-1
4907	1
4929	1
4938	-1
4940	-1
4957	-1
5008	-1
5031	-1
5048	-1
5119	-1
5152	1
5174	1
5230	1
5241	1
5283	1
5294	-1
5328	-1
5347	-1
5393	-1
5433	-1
5447	-1
5478	-1
5570	1
5586	1
5594	1
5596	1
5604	-1
5655	1
5685	-1
5688	-1
5696	-1
5698	-1
5699	-1
5702	-1
5705	-1
5708	-1
5713	-1
5718	-1
5721	-1
5816	1
5822	-1
5826	1
5831	-1
5836	1
5873	-1
5891	1
5902	1
5911	-1
5932	1
5933	-1
6019	1
6120	-1
6155	1
6160	1
6164	1
6185	-1
6194	1
6210	1
6230	1
6232	1
6241	-1
6297	1
6300	1
6397	-1
6451	1
6472	-1
6510	-1
6576	-1
6595	1
6605	1
6627	-1
6676	-1
6713	1
6730	-1
6772	-1
6788	-1
6790	-1
6814	1
6833	1
6836	-1
6888	1
6890	-1
6906	-1
6990	1
7011	-1
7021	-1
7162	1
7170	-1
7227	1
7277	-1
7301	1
7371	-1
7373	1
7416	1
7468	1
7480	-1
7494	1
7534	-1
7706	-1
7730	1
7771	-1
7804	-1
7869	1
7903	-1
7941	-1
8139	-1
8190	1
8269	1
8317	-1
8318	-1
8355	-1
8379	-1
8412	1
8438	-1
8445	-1
8449	-1
8464	-1
8544	-1
8566	-1
8601	-1
8614	1
8739	1
8745	1
8837	-1
8864	1
8874	-1
8894	-1
8924	-1
9013	-1
9034	-1
9043	1
9055	-1
9056	-1
9057	-1
9100	-1
9123	-1
9133	-1
9140	-1
9156	-1
9212	1
9232	-1
9246	-1
9252	1
9262	-1
9289	-1
9391	-1
9401	-1
9456	-1
9493	-1
9547	1
9582	-1
9589	1
9620	1
9631	1
9636	-1
9688	-1
9695	-1
9741	1
9742	1
9777	-1
9780	-1
9785	-1
9787	-1
9790	-1
9793	-1
9797	-1
9798	-1
9823	1
9833	-1
9885	-1
9914	-1
9948	-1
10048	-1
10055	-1
10095	-1
10112	-1
10139	-1
10194	1
10204	-1
10210	1
10213	1
10279	1
10300	-1
10328	-1
10370	1
10403	-1
10428	-1
10437	-1
10446	1
10460	-1
10486	1
10553	-1
10561	-1
10576	-1
10606	1
10614	1
10615	-1
10628	1
10643	1
10647	1
10648	-1
10670	1
10733	-1
10742	1
10744	1
10768	1
10785	-1
10801	-1
10807	1
10808	-1
10855	-1
10874	1
10962	-1
10963	-1
10974	-1
11004	-1
11017	-1
11021	-1
11047	-1
11065	-1
11091	-1
11118	-1
11120	-1
11122	1
11128	-1
11190	-1
11201	1
11260	-1
11274	-1
11322	-1
22820	-1
22828	1
22919	-1
22974	-1
22996	1
23016	-1
23024	1
23030	1
23059	1
23076	1
23080	-1
23168	-1
23177	1
23198	-1
23199	-1
23254	1
23259	1
23318	-1
23367	-1
23413	-1
23446	1
23450	-1
23519	1
23528	1
23541	1
23560	-1
23590	1
23603	-1
23644	-1
23683	1
23753	-1
23787	-1
24137	-1
24145	-1
25825	-1
25901	1
25949	1
25961	1
25977	-1
26018	1
26040	1
26255	-1
26263	-1
26276	-1
26355	1
26493	-1
27086	-1
27101	1
27130	-1
27151	1
27161	-1
27183	-1
27235	-1
27240	-1
27338	-1
28982	-1
29100	-1
29105	-1
29109	-1
29115	-1
29123	-1
29127	-1
29957	1
29997	1
50515	-1
50807	-1
51056	-1
51072	1
51117	1
51121	1
51143	-1
51155	-1
51166	-1
51203	-1
51232	1
51237	1
51256	-1
51365	-1
51371	-1
51388	1
51393	-1
51495	1
51512	1
51526	-1
51608	-1
51645	-1
51654	1
51659	-1
51693	-1
51726	-1
53340	1
54102	1
54205	1
54414	1
54443	-1
54465	1
54478	-1
54502	1
54520	-1
54578	-1
54585	1
54812	1
54836	1
54849	-1
54882	1
54920	-1
54957	1
54981	1
54985	1
55008	-1
55041	-1
55124	-1
55143	-1
55145	1
55159	-1
55165	-1
55173	-1
55194	1
55248	-1
55255	-1
55257	-1
55308	1
55344	1
55349	1
55355	-1
55379	-1
55466	-1
55605	-1
55614	1
55629	1
55635	1
55638	1
55640	-1
55665	1
55697	-1
55765	-1
55788	1
55794	-1
55812	1
55832	-1
55837	1
55839	1
55840	-1
55848	1
55859	1
55872	-1
55915	-1
55930	1
55958	1
55966	-1
55970	1
55975	1
56204	1
56259	-1
56655	-1
56912	1
56942	-1
56986	1
56992	-1
56994	1
57017	-1
57088	1
57099	-1
57127	-1
57175	-1
57176	-1
57332	-1
57405	-1
57496	1
57535	-1
57593	1
57619	1
57621	1
57674	-1
57758	1
57763	1
58478	-1
58495	-1
58517	1
59277	1
60386	-1
60481	1
64147	1
64151	-1
64376	1
64377	1
64423	-1
64432	1
64761	-1
64785	-1
64943	1
65094	-1
65264	-1
78995	-1
79017	-1
79019	-1
79047	1
79071	1
79075	-1
79139	-1
79152	-1
79157	-1
79600	1
79789	1
79791	1
79801	-1
79832	-1
79866	-1
79877	1
79901	1
79902	-1
79913	-1
80173	1
80209	-1
80219	-1
80346	-1
80758	-1
81552	-1
81563	1
81576	1
81603	1
81620	1
81624	1
83605	-1
83658	-1
83719	1
83737	-1
83861	1
83879	1
83892	-1
83941	1
84000	-1
84057	-1
84085	1
84138	-1
84148	1
84186	1
84285	-1
84333	-1
84342	-1
84525	-1
84572	1
84749	-1
84775	-1
84879	-1
84883	1
84908	-1
84916	1
84930	1
84952	1
84955	-1
84991	1
87178	-1
89765	-1
89927	1
90417	-1
90737	1
90864	1
91523	-1
92565	1
92840	1
92960	1
93129	1
94056	-1
94240	-1
113115	-1
113130	-1
114049	-1
114876	1
115209	1
115294	1
115362	-1
116448	-1
116496	1
116844	1
117155	1
121355	1
123263	1
126755	1
126823	1
127700	1
128218	1
132720	1
134266	-1
138151	-1
140606	1
145748	-1
146456	-1
146923	1
148156	1
148206	1
151194	1
197259	-1
200895	1
203547	-1
205564	-1
219445	-1
221294	1
221662	1
222166	1
246243	1
257106	-1
260293	1
266740	1
283237	-1
284273	1
317781	-1
338328	1
349149	1

## Sheet: Obesity_sig
Obesity signature
ENTREZ	Standard vector
1	-1
32	1
51	1
58	-1
70	-1
93	-1
98	1
185	1
222	-1
273	-1
301	1
310	1
321	-1
384	-1
534	-1
575	-1
607	-1
634	-1
683	1
711	-1
719	1
734	1
762	1
770	-1
775	-1
781	1
784	-1
788	1
794	1
801	1
858	1
883	-1
923	-1
996	-1
1002	-1
1066	1
1082	-1
1108	-1
1119	-1
1154	-1
1160	1
1164	-1
1181	-1
1196	-1
1196	-1
1287	-1
1288	-1
1294	-1
1298	-1
1299	-1
1302	-1
1318	1
1382	-1
1389	1
1438	1
1488	-1
1580	1
1592	-1
1606	-1
1634	1
1663	-1
1746	-1
1757	-1
1775	-1
1829	-1
1846	-1
1879	1
1911	-1
1933	-1
1937	-1
1938	-1
1942	-1
2011	-1
2012	1
2038	1
2091	-1
2110	1
2115	-1
2134	-1
2155	-1
2187	-1
2200	1
2202	1
2213	1
2252	1
2275	-1
2288	-1
2319	-1
2350	1
2521	-1
2535	-1
2593	-1
2625	-1
2662	1
2675	1
2686	-1
2786	-1
2788	-1
2790	1
2794	-1
2819	1
2822	1
2859	-1
2863	-1
2877	-1
2923	-1
2934	1
2962	-1
3005	-1
3075	1
3081	-1
3150	-1
3249	-1
3276	-1
3280	-1
3290	1
3321	-1
3371	-1
3554	1
3609	-1
3640	1
3675	-1
3714	-1
3728	-1
3732	-1
3745	1
3748	-1
3751	1
3755	-1
3770	-1
3778	-1
3782	-1
3816	-1
3852	-1
3902	-1
3910	1
3978	-1
3980	-1
4058	-1
4060	1
4143	-1
4190	1
4192	-1
4293	-1
4352	1
4355	-1
4485	-1
4486	-1
4488	-1
4494	-1
4744	-1
4798	-1
4828	1
4857	1
4883	1
4884	-1
4886	1
4889	1
5101	1
5129	-1
5137	-1
5190	-1
5207	1
5296	-1
5318	-1
5324	-1
5355	-1
5376	1
5413	-1
5424	-1
5427	-1
5514	-1
5524	-1
5569	-1
5590	-1
5596	-1
5602	1
5625	-1
5634	-1
5724	1
5733	1
5781	1
5831	-1
5883	-1
5915	-1
5916	-1
5959	1
5984	-1
6097	-1
6122	-1
6136	-1
6137	-1
6139	-1
6141	-1
6152	-1
6158	-1
6159	-1
6167	-1
6170	-1
6170	-1
6189	-1
6191	-1
6208	-1
6210	-1
6229	-1
6242	-1
6253	-1
6307	-1
6334	-1
6421	-1
6445	1
6510	1
6545	1
6599	-1
6636	-1
6652	-1
6714	-1
6721	-1
6764	-1
6770	-1
6913	1
6926	-1
6932	-1
7015	-1
7157	-1
7169	-1
7249	-1
7345	1
7349	-1
7360	1
7364	-1
7365	-1
7474	-1
7499	1
7551	-1
7593	-1
7625	-1
7637	-1
7748	-1
7753	-1
7760	-1
7775	-1
7780	-1
7916	-1
7991	-1
8019	-1
8021	-1
8034	1
8076	1
8086	-1
8089	-1
8187	-1
8189	-1
8237	-1
8237	-1
8241	-1
8322	1
8359	-1
8396	-1
8481	-1
8553	-1
8570	-1
8572	-1
8632	-1
8798	-1
8814	1
8839	1
8861	-1
8906	-1
8926	-1
8927	-1
8992	1
9047	-1
9061	-1
9092	-1
9136	-1
9145	-1
9235	-1
9254	-1
9370	1
9394	-1
9456	-1
9459	1
9466	-1
9509	1
9604	1
9654	-1
9742	-1
9746	-1
9820	-1
9918	-1
9925	-1
9926	1
9940	1
10008	1
10025	-1
10060	1
10083	-1
10110	1
10114	1
10124	-1
10140	-1
10152	-1
10155	-1
10224	-1
10256	-1
10280	-1
10385	-1
10399	-1
10521	-1
10522	-1
10535	-1
10610	-1
10659	1
10720	-1
10740	-1
10763	-1
10765	-1
10810	1
10849	-1
10868	-1
10902	-1
10919	-1
10951	-1
10961	-1
10998	-1
11013	-1
11147	-1
11180	-1
11223	-1
11237	-1
11237	1
11244	1
11253	-1
22838	-1
22873	-1
22883	-1
22937	-1
23081	-1
23082	-1
23089	-1
23114	-1
23126	-1
23205	-1
23217	-1
23269	-1
23363	-1
23403	-1
23421	-1
23433	1
23460	1
23481	-1
23521	-1
23523	-1
23523	-1
23531	1
23542	-1
23563	-1
23598	-1
23640	-1
23647	-1
23743	1
25890	1
25939	1
26000	-1
26013	-1
26047	-1
26151	-1
26166	1
26167	-1
26233	-1
26261	-1
26353	1
26354	-1
26577	1
26872	1
27005	-1
27092	-1
27129	1
27286	1
27316	-1
27346	-1
27440	-1
29789	-1
29796	1
29958	1
29969	1
29995	1
30000	-1
30845	-1
50507	1
50636	-1
50861	-1
50862	1
50863	1
51053	-1
51116	-1
51176	-1
51421	1
51477	-1
51514	-1
51599	-1
51655	1
51750	-1
51776	1
53342	1
53635	-1
54094	-1
54221	1
54487	-1
54512	-1
54535	-1
54880	-1
54972	-1
54997	-1
55072	-1
55124	-1
55144	-1
55147	-1
55190	-1
55214	-1
55286	1
55311	-1
55374	-1
55621	-1
55701	1
55715	-1
55738	-1
55765	-1
55819	1
55859	-1
56143	-1
56246	1
56256	-1
56603	1
56924	-1
56937	1
56949	-1
57106	-1
57124	1
57291	-1
57332	-1
57419	1
57497	-1
57555	-1
57613	-1
57623	1
57680	-1
57695	-1
57713	-1
57820	-1
57821	-1
58500	-1
58533	1
60314	-1
60681	-1
63924	1
64064	-1
64073	-1
64081	1
64168	1
64219	1
64231	1
64359	-1
64400	1
64757	1
64763	-1
65057	-1
65108	-1
65243	-1
65266	-1
65989	-1
79022	-1
79025	-1
79101	-1
79140	-1
79160	-1
79190	1
79614	1
79689	1
79690	-1
79712	1
79805	-1
79861	-1
79869	-1
79915	-1
79957	-1
79971	-1
79987	1
80154	-1
80154	-1
80162	-1
80279	-1
80344	-1
80347	-1
80704	1
80760	1
80775	-1
80830	1
80854	1
80863	-1
81603	1
81618	-1
81831	-1
81857	-1
83473	1
83650	-1
83743	-1
83871	-1
84057	-1
84133	-1
84197	-1
84221	-1
84271	-1
84292	-1
84303	-1
84365	-1
84433	-1
84461	-1
84501	-1
84532	-1
84561	-1
84674	1
84717	-1
84798	-1
84856	-1
84865	-1
84883	1
84886	1
84889	-1
84914	-1
84922	-1
84935	1
84950	-1
84960	-1
84981	1
84986	-1
85028	-1
85301	-1
85320	-1
85477	1
90135	1
90233	-1
90506	-1
90522	-1
90525	-1
90678	-1
90701	-1
91227	-1
91227	-1
91522	-1
91975	-1
92292	-1
92312	-1
92312	-1
92714	-1
112724	-1
112939	-1
114044	-1
114821	-1
115509	-1
115703	-1
116328	1
116840	-1
117581	1
117854	1
120071	-1
120224	-1
122402	-1
122616	-1
122953	1
123016	-1
123879	1
124930	-1
126364	1
127281	-1
130399	1
130612	-1
130827	1
134145	1
134353	-1
136051	-1
137075	1
140578	-1
140680	-1
144203	-1
144423	-1
145376	1
147341	-1
147699	-1
147968	-1
148189	-1
148252	-1
150223	-1
150291	-1
151230	-1
151306	1
151887	1
152302	1
154807	1
158056	-1
163154	-1
163786	-1
164592	-1
166336	1
169200	1
171391	-1
196047	1
196403	-1
196968	-1
197258	-1
200058	-1
200172	-1
200765	-1
206338	1
221914	-1
253650	-1
254228	1
254887	-1
256355	-1
259217	1
267002	-1
283989	-1
284086	-1
284217	-1
284339	-1
284889	-1
284904	-1
285386	1
285386	1
285986	-1
286826	-1
333926	-1
338094	1
338382	1
339479	-1
339665	-1
339834	1
339983	1
340719	1
348094	1
349114	-1
353149	-1
373863	-1
375790	-1
378825	-1
388152	-1
388610	-1
388650	1
388886	-1
389136	1
389756	1
390595	-1
390705	-1
391777	-1
392008	-1
400818	-1
401105	-1
414328	1
441294	-1
442075	-1
552889	-1
643669	-1
643783	1
644189	1
645683	-1
653140	1
728411	-1
729046	-1
100128164	1
100128553	-1
100129583	1
100129946	-1
100130360	-1
100130776	-1
100132406	-1
100132708	-1

## Sheet: TGF_sig
TGF-β signature
ENTREZ	Standard vector
2	1
124	1
126	1
199	-1
214	-1
214	-1
247	1
307	1
374	-1
397	-1
427	-1
624	1
629	1
634	1
942	1
948	1
966	-1
999	-1
1005	1
1028	1
1117	1
1240	-1
1300	-1
1440	-1
1525	-1
1535	1
1594	-1
1662	-1
1805	1
1805	1
1959	1
2152	-1
2167	-1
2171	-1
2202	1
2224	-1
2252	-1
2277	1
2706	-1
2768	-1
2781	-1
2828	-1
2919	-1
2920	-1
2920	-1
2921	-1
2921	-1
3009	-1
3105	1
3119	1
3157	-1
3157	-1
3399	-1
3423	-1
3426	1
3426	1
3429	1
3429	1
3433	1
3434	1
3437	1
3479	1
3479	1
3485	-1
3488	1
3575	-1
3673	-1
3687	-1
3868	1
3918	-1
3918	-1
3992	-1
4133	-1
4312	-1
4314	-1
4852	1
4908	1
4919	1
4938	1
4939	1
4939	1
4967	-1
5010	-1
5013	-1
5017	1
5054	-1
5318	1
5320	1
5354	-1
5577	-1
5740	1
5740	1
5791	-1
5791	-1
5874	-1
5918	1
5997	1
6273	-1
6274	-1
6307	-1
6319	-1
6423	1
6424	1
6653	-1
6664	1
6772	1
6934	1
7052	1
7054	-1
7164	-1
7277	-1
7324	1
7424	-1
8076	1
8626	-1
8638	1
8701	-1
8701	-1
8743	1
8817	1
8876	-1
8876	-1
9249	1
9388	-1
9447	-1
9509	1
9509	1
9636	1
9645	-1
9647	-1
9706	1
9750	1
9768	-1
10000	-1
10205	-1
10231	1
10451	1
10468	-1
10631	1
10964	1
11013	-1
11274	1
22822	-1
23133	-1
23213	1
25890	-1
29126	-1
29940	-1
50615	-1
51176	-1
51704	1
54209	1
54518	1
54518	1
54674	1
54739	1
54756	1
55022	-1
55258	1
55266	-1
55612	-1
55714	-1
55734	-1
55784	-1
56034	-1
56062	-1
56603	1
57016	-1
57101	1
57823	-1
58494	-1
64093	-1
64168	-1
64288	1
64321	-1
64798	1
64866	-1
79413	-1
79772	-1
79817	-1
80833	1
81553	-1
81704	1
84002	-1
84528	-1
84671	1
113730	1
114548	-1
135250	-1
137994	-1
140876	1
146439	-1
147372	-1
147837	1
148641	-1
163732	-1
164633	-1
201161	1
201799	-1
219855	-1
255738	-1
259266	-1
282616	1
286133	1
339479	-1
339834	-1
377677	-1
388115	-1
389336	-1
400745	-1
